# Supplementary material for: Cost-Effectiveness Evaluation of Add-on Empagliflozin in Patients With Heart Failure and a Reduced Ejection Fraction From the Healthcare System's Perspective in the Asia-Pacific Region
Source: PubMed Central journal article supplement (PMC8586201; doi:10.3389/fcvm.2021.750381), 2021-10-29
Supplement: Image_1.pdf [file Image_1.pdf]

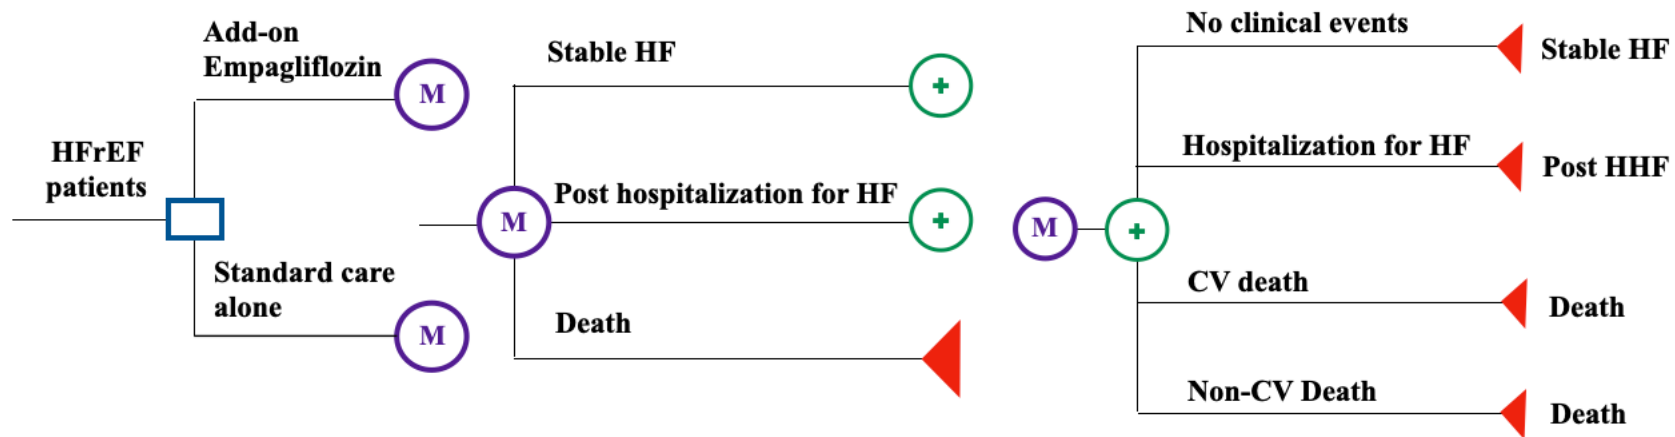

**Supplementary Figure 1.** Overview of detailed structure of the original model in base-case cost-effectiveness analysis. HFrEF, heart failure and a reduced ejection fraction; HF, heart failure; HHF, hospitalization for heart failure; CV, cardiovascular.
