# Supplementary material for: Cost-Effectiveness Evaluation of Add-on Empagliflozin in Patients With Heart Failure and a Reduced Ejection Fraction From the Healthcare System's Perspective in the Asia-Pacific Region
Source: PubMed Central journal article supplement (PMC8586201; doi:10.3389/fcvm.2021.750381), 2021-10-29
Supplement: Image_2.pdf [file Image_2.pdf]

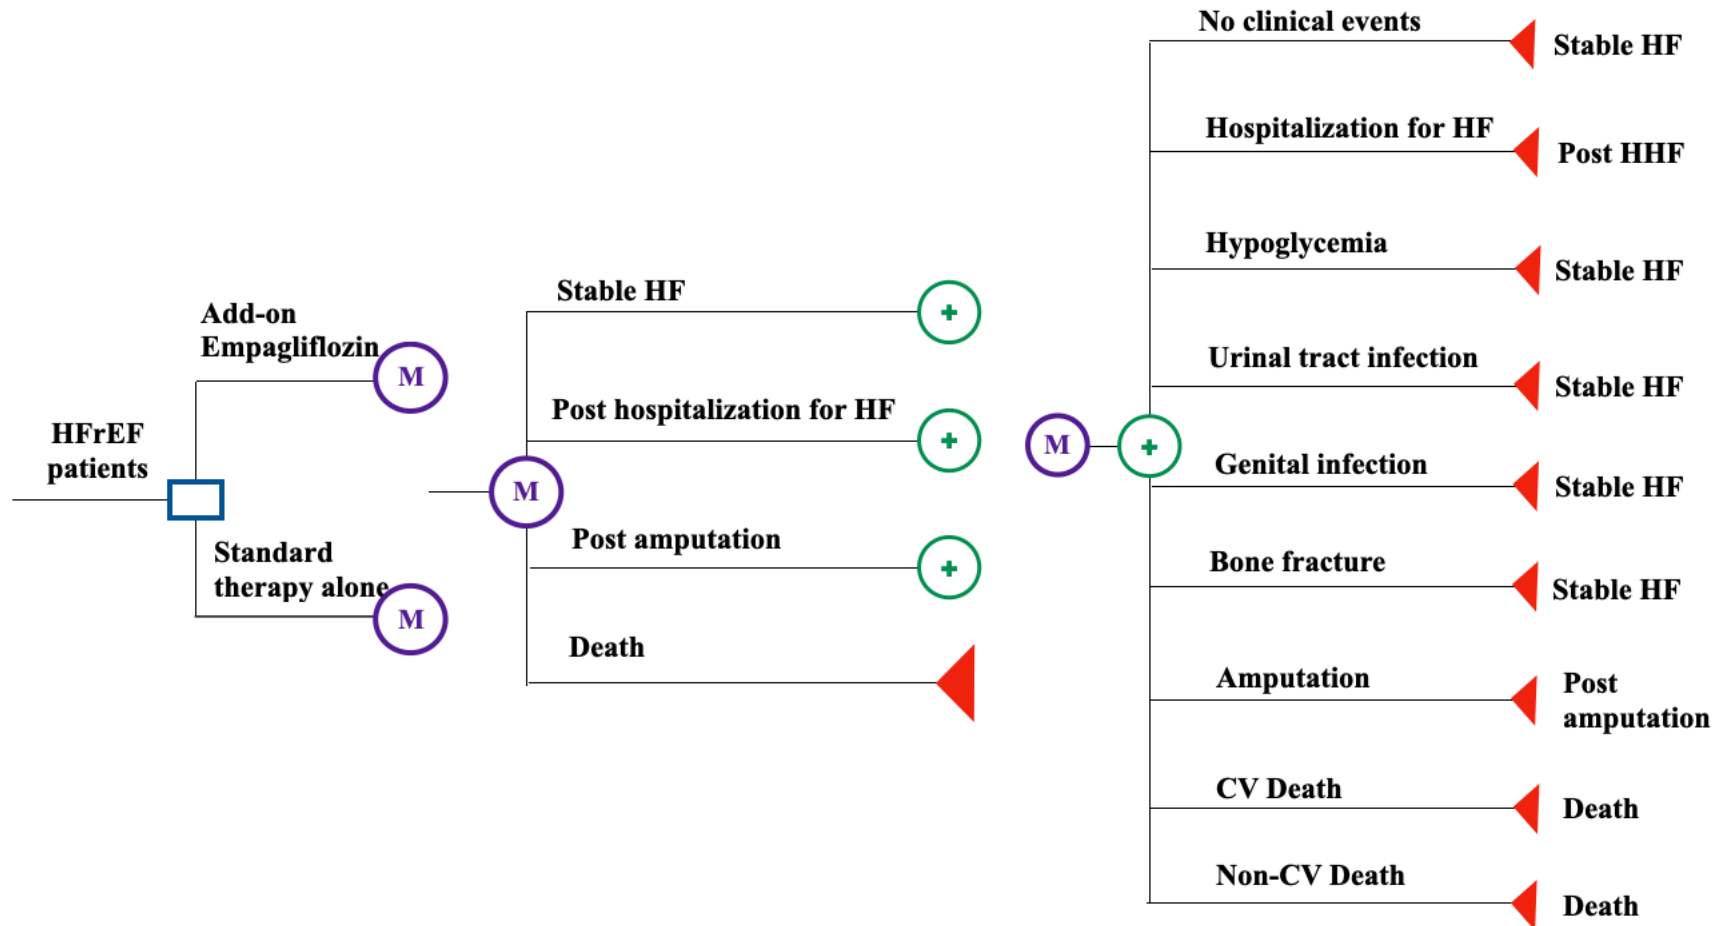

**Supplementary Figure 2.** Overview of detailed structure of the Model 2 in cost-effectiveness analysis where adverse events of treatment were considered. HFrEF, heart failure and a reduced ejection fraction; HF, heart failure; HHF, hospitalization for heart failure; CV, cardiovascular.
