# Supplementary material for: Cost-Effectiveness Evaluation of Add-on Empagliflozin in Patients With Heart Failure and a Reduced Ejection Fraction From the Healthcare System's Perspective in the Asia-Pacific Region
Source: PubMed Central journal article supplement (PMC8586201; doi:10.3389/fcvm.2021.750381), 2021-10-29
Supplement: Image_3.pdf [file Image_3.pdf]

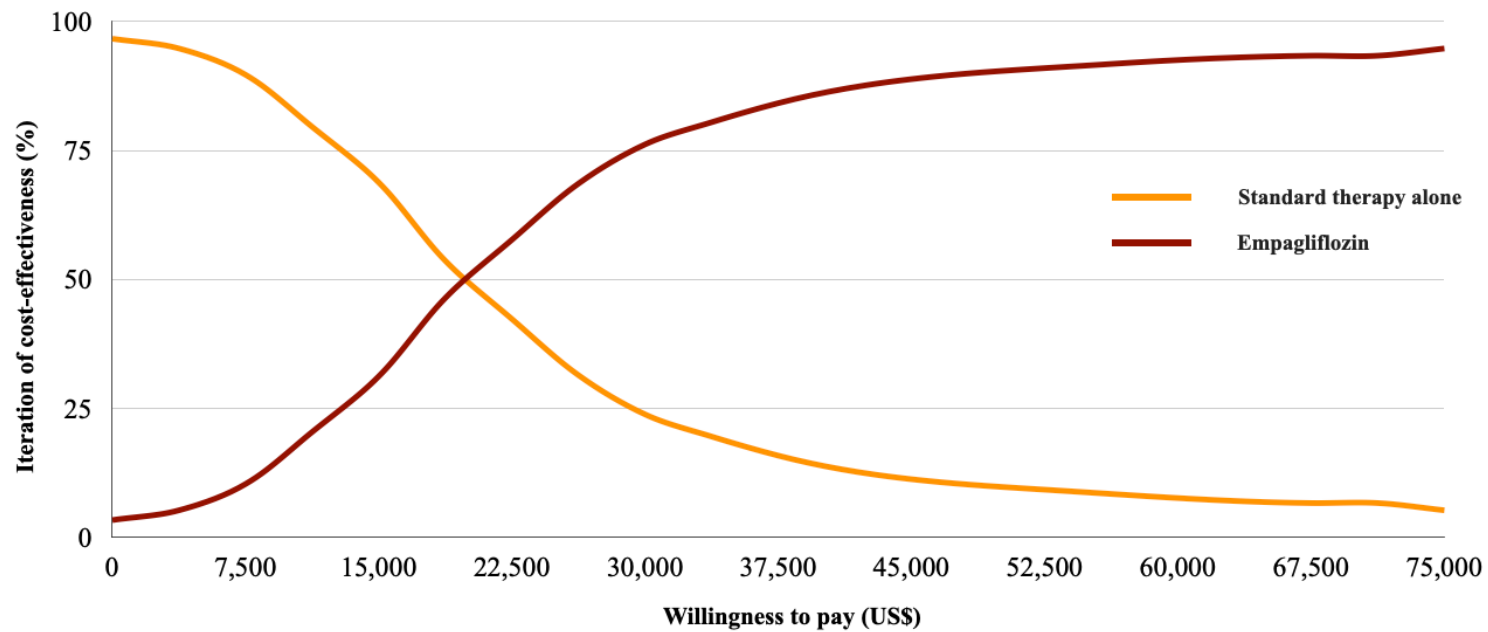

**Supplementary Figure 3.** Cost-effectiveness acceptability curves. Iterations of the cost-effectiveness of empagliflozin versus placebo under different willingness to pay thresholds in Taiwan. The red curve is for the population with add-on empagliflozin; the orange curve is for the population with standard therapy.
