# Supplementary material for: Cost-Effectiveness Evaluation of Add-on Empagliflozin in Patients With Heart Failure and a Reduced Ejection Fraction From the Healthcare System's Perspective in the Asia-Pacific Region
Source: PubMed Central journal article supplement (PMC8586201; doi:10.3389/fcvm.2021.750381), 2021-10-29
Supplement: Image_4.pdf [file Image_4.pdf]

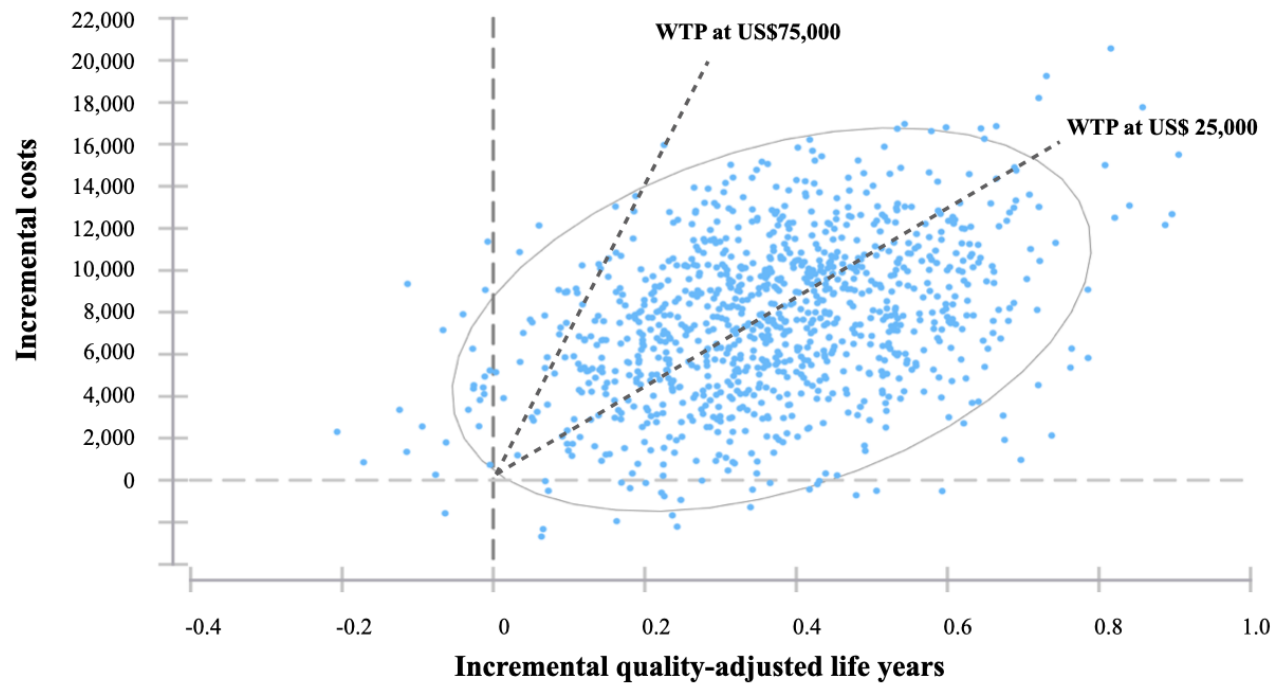

**Supplementary Figure 4.** Incremental cost-effectiveness scatterplot distribution of empagliflozin added to standard therapy versus standard therapy alone in patients with heart failure and a reduced ejection fraction. WTP, willingness to pay.
