# Supplementary material for: Cost-Effectiveness Evaluation of Add-on Empagliflozin in Patients With Heart Failure and a Reduced Ejection Fraction From the Healthcare System's Perspective in the Asia-Pacific Region
Source: PubMed Central journal article supplement (PMC8586201; doi:10.3389/fcvm.2021.750381), 2021-10-29
Supplement: Image_6.pdf [file Image_6.pdf]

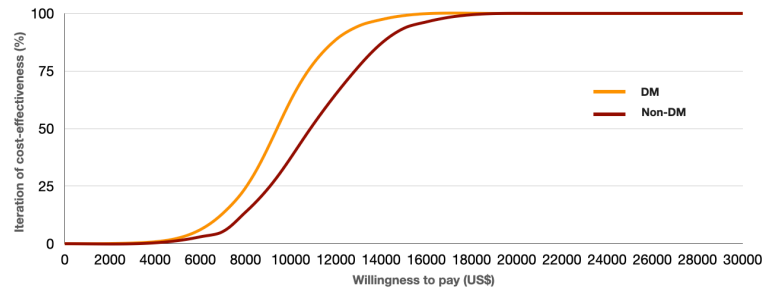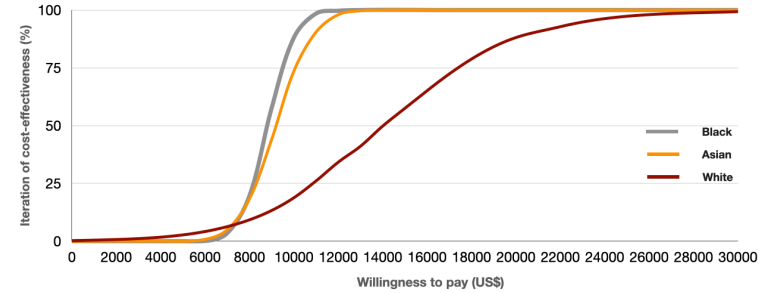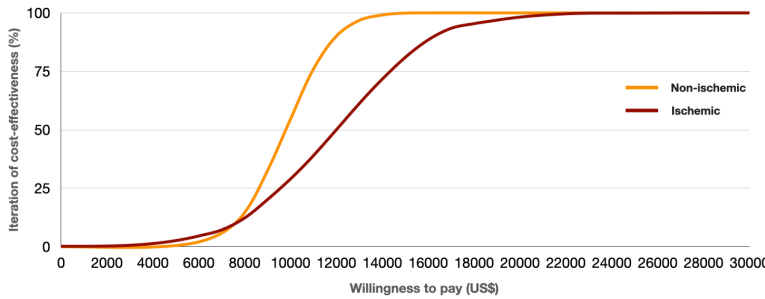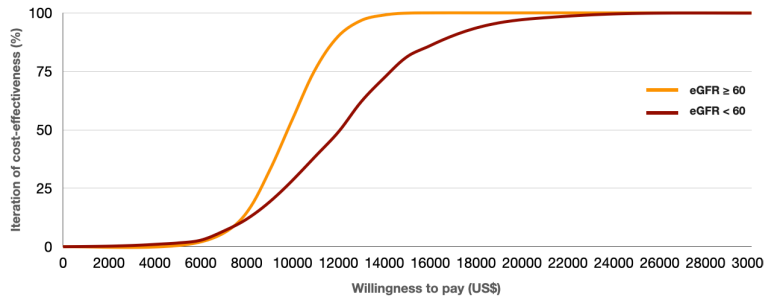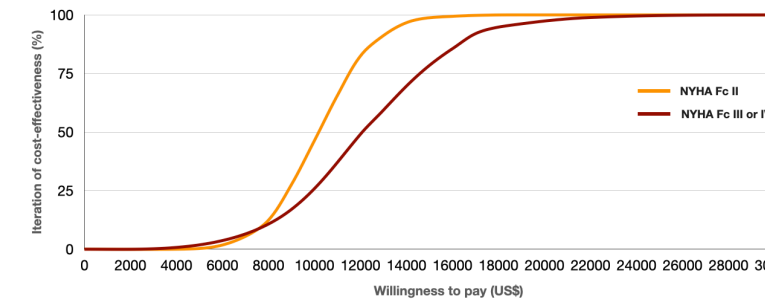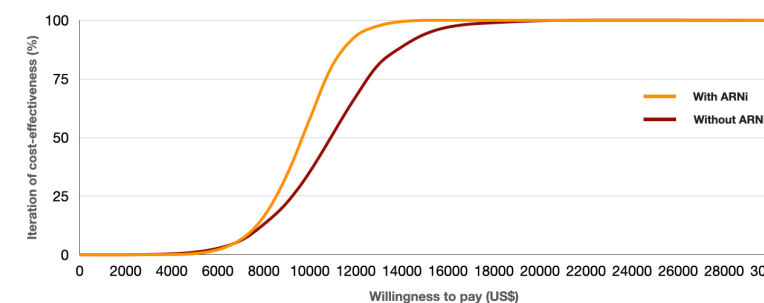

**Supplementary Figure 6.** Cost-effectiveness acceptability curves. Iterations of the cost-effectiveness of empagliflozin versus placebo in the subgroup analyses.
